# Supplementary material for: α acid fraction from Hop extract exerts an endothelium-derived hyperpolarization vasorelaxant effect through TRPV4 employing the feedforward mechanism of PKCα
Source: Royal Society of Chemistry journal article supplement (doi:10.1039/d4fo00058g), 2024-01-01
Supplement: d4fo00058g1.pdf [file d4fo00058g1.pdf]

**$\alpha$  acid fraction from Hop extract exerts an endothelium-derived hyperpolarization vasorelaxant effect through TRPV4 employing a feedforward mechanism of PKC $\alpha$**

Paola Di Pietro<sup>1\*</sup>, Emanuela Salviati<sup>2\*</sup>, Antonio Damato<sup>3</sup>, Valeria Prete<sup>1</sup>, Angela Abate<sup>1</sup>, Pietro Campiglia<sup>2</sup>, Carmine Vecchione<sup>1,2</sup>, Eduardo Sommella<sup>2</sup> and Albino Carrizzo<sup>1,2</sup>

<sup>1</sup>Department of Medicine Surgery and Dentistry “Scuola Medica Salernitana”, Baronissi (SA), 84081, Italy

<sup>2</sup>Department of Pharmacy, University of Salerno, Fisciano, SA, 84084, Italy

<sup>3</sup>IRCCS Neuromed, Istituto Neurologico Mediterraneo, Pozzilli (IS), 86077, Italy

**Running title** (5 words): Hop-derived  $\alpha$  acid evokes vasorelaxation

\*P. Di Pietro and E. Salviati contributed equally

**Corresponding author:**

Prof. Albino Carrizzo; Department of Medicine Surgery and Dentistry “Scuola Medica Salernitana”, Baronissi (SA), 84081, Italy and IRCCS Neuromed, Istituto Neurologico Mediterraneo, Pozzilli (IS), 86077, Italy

[acarrizzo@unisa.it](mailto:acarrizzo@unisa.it)

Declarations of interest: none

**Table S1:** Qualitative characterization of different Hop fractions by UHPLC-MS/MS

| Peak                               | r <sub>t</sub><br>(min) | Compound                                        | [M-H] <sup>-</sup> | [MS/MS]                                       | Error<br>(ppm) | PDA<br>λ <sub>max</sub><br>(nm) | Molecular<br>Formula                            |
|------------------------------------|-------------------------|-------------------------------------------------|--------------------|-----------------------------------------------|----------------|---------------------------------|-------------------------------------------------|
| <b>Hop Fraction A (HOP A)</b>      |                         |                                                 |                    |                                               |                |                                 |                                                 |
| <i>Hydroxycinnamic acid</i>        |                         |                                                 |                    |                                               |                |                                 |                                                 |
| 1                                  | 1.83                    | 3'- caffeolquinic acid (Chlorogenic acid) *     | 353.0850           | 191.0625,<br>179.0385                         | 0.85           | 320                             | C <sub>16</sub> H <sub>18</sub> O <sub>9</sub>  |
| 2                                  | 2.65                    | 3'- coumaroylquinic acid                        | 337.0922           | 163.0407,<br>119.0394                         | -2.67          | 304                             | C <sub>16</sub> H <sub>18</sub> O <sub>8</sub>  |
| 3                                  | 3.52                    | 3' - feruloylquinic acid                        | 367.1040           | 193.0516,<br>134.0216                         | 1.36           | 322                             | C <sub>17</sub> H <sub>20</sub> O <sub>9</sub>  |
| <i>Flavonols</i>                   |                         |                                                 |                    |                                               |                |                                 |                                                 |
| 4                                  | 6.50                    | Quercetin 3-O-( 2-rhamnosyl) - hexoside         | 755.2036           | 301.0333,<br>255.0535<br>271.0211             | -0.53          | 256,<br>299                     | C <sub>33</sub> H <sub>40</sub> O <sub>20</sub> |
| 5                                  | 6.99                    | Quercetin 3-O-galactoside*                      | 463.0855           | 301.0346,<br>271.0255<br>255.0290             | -3.89          | 255                             | C <sub>21</sub> H <sub>20</sub> O <sub>12</sub> |
| 6                                  | 7.48                    | Rutin*                                          | 609.1445           | 301.0362,<br>255.0306<br>271.0269             | -4.43          | 353                             | C <sub>27</sub> H <sub>30</sub> O <sub>16</sub> |
| 7                                  | 7.78                    | Quercetin 3-O-glucoside*                        | 463.0855           | 301.0346,<br>271.0255<br>255.0290             | -4.53          | 255                             | C <sub>21</sub> H <sub>20</sub> O <sub>12</sub> |
| 8                                  | 8.33                    | Quercetin 3-O-(acetyl) -hexoside                | 505.0972           | 301.0381,<br>271.0204<br>255.0288             | -3.17          | 311                             | C <sub>23</sub> H <sub>22</sub> O <sub>13</sub> |
| 9                                  | 8.63                    | Kaempferol 3-O-hexoside                         | 635.1601           | 285.0384,<br>593.1373<br>255.0300<br>227.0416 | 0.63           | 262,<br>345                     | C <sub>29</sub> H <sub>32</sub> O <sub>16</sub> |
| 10                                 | 8.88                    | Kaempferol 3-O-di-hexoside                      | 593.1413           | 285.0393,<br>255.0279<br>227.0656             | -2.42          | 265,<br>344                     | C <sub>27</sub> H <sub>30</sub> O <sub>15</sub> |
| 11                                 | 8.94                    | Kaempferol 3-O-(malonyl-hexoside )-O-rhamnoside | 447.0949           | 285.0433,<br>255.0302<br>227.0741             | 4.03           | 264,<br>345                     | C <sub>21</sub> H <sub>20</sub> O <sub>11</sub> |
| 12                                 | 2.30                    | Epicatechin dimer                               | 577.1247           | 407.0662,<br>289.0448                         | -4.97          | 279                             | C <sub>30</sub> H <sub>26</sub> O <sub>12</sub> |
| 13                                 | 3.10                    | Epicatechin dimer isomer II                     | 577.1288           | 407.0729,<br>289.0619                         | 1.73           | 279                             | C <sub>30</sub> H <sub>26</sub> O <sub>12</sub> |
| <b>Hop Fraction B (HOP B)</b>      |                         |                                                 |                    |                                               |                |                                 |                                                 |
| <i>α- and β- acids derivatives</i> |                         |                                                 |                    |                                               |                |                                 |                                                 |
| 14                                 | 13.50                   | Oxy-humulone                                    | 393.1912           | 349.2050,<br>263.1292<br>395.1898             | -4.42          | 255,<br>323                     | C <sub>21</sub> H <sub>30</sub> O <sub>7</sub>  |
| 15                                 | 14.00                   | Humulinone isomer                               | 377.1928           | 263.1259,<br>221.0969                         | -5.04          | 285,<br>323                     | C <sub>21</sub> H <sub>30</sub> O <sub>6</sub>  |
| 16                                 | 15.15                   | Oxidized humulinone derivative                  | 409.1879           | 263.1285,<br>295.1130                         | 0.98           | 285,<br>323                     | C <sub>21</sub> H <sub>30</sub> O <sub>8</sub>  |
| 17                                 | 16.6                    | Oxidized humulinone derivative                  | 409.1879           | 263.1285,                                     | 0.98           | 285,                            | C <sub>21</sub> H <sub>30</sub> O               |

|                                                         |           |                               |          |                                    |       |             |                                                |
|---------------------------------------------------------|-----------|-------------------------------|----------|------------------------------------|-------|-------------|------------------------------------------------|
|                                                         | 0         | isomer                        |          | 295.1130                           |       | 323         | 8                                              |
| 18                                                      | 17.6<br>9 | Cohumulone                    | 347.1862 | 278.1176,<br>235.0624              | -0.58 | 285,<br>323 | C <sub>20</sub> H <sub>28</sub> O <sub>5</sub> |
| 19                                                      | 18.6<br>5 | Cohumulone                    | 363.1814 | 278.1176,<br>235.0624              | -1.38 | 275,<br>310 | C <sub>20</sub> H <sub>28</sub> O <sub>6</sub> |
| 20                                                      | 19.1<br>5 | Humulinone                    | 377.1968 | 292.1315,<br>249.0765              | -5.04 | 285,<br>323 | C <sub>21</sub> H <sub>30</sub> O <sub>6</sub> |
| 21                                                      | 20.8<br>4 | Cohumulone isomer             | 347.1862 | 235.0624,278.117<br>6              | -0.58 | 285,<br>323 | C <sub>20</sub> H <sub>28</sub> O <sub>5</sub> |
| 22                                                      | 21.4<br>0 | Iso- $\alpha$ -ad/n-humulone  | 361.2015 | 265.1428,<br>363.1836              | 2.21  | 285,<br>323 | C <sub>21</sub> H <sub>30</sub> O <sub>5</sub> |
| 23                                                      | 21.7<br>0 | Deoxycohumulone               | 331.1920 | 262.1292,<br>194.0621              | 1.51  | 290,<br>335 | C <sub>20</sub> H <sub>28</sub> O <sub>4</sub> |
| 24                                                      | 24.3<br>0 | Prehumulone                   | 375.1818 | 306.1319                           | 2.40  | 285,<br>325 | C <sub>22</sub> H <sub>32</sub> O <sub>5</sub> |
| 25                                                      | 18.1<br>0 | Cohulupone                    | 317.1765 | 248.0959,<br>135.3119              | 2.21  | 280,<br>335 | C <sub>19</sub> H <sub>26</sub> O <sub>4</sub> |
| <b>Hop Fraction C (HOP C)</b>                           |           |                               |          |                                    |       |             |                                                |
| <i><b><math>\beta</math>- acids and derivatives</b></i> |           |                               |          |                                    |       |             |                                                |
| 26                                                      | 21.7<br>0 | Lupulone E                    | 415.2489 | 259.1037,<br>303.1277              | -0.24 | 235,<br>360 | C <sub>25</sub> H <sub>36</sub> O <sub>5</sub> |
| 27                                                      | 22.5<br>6 | Postlupulone                  | 385.1228 | 273.0903,<br>248.9524              | -3.63 | 280,<br>335 | C <sub>24</sub> H <sub>34</sub> O <sub>4</sub> |
| 28                                                      | 24.1<br>0 | Colupulone                    | 399.2541 | 287.1253,<br>219.0712              | -0.25 | 280,<br>335 | C <sub>25</sub> H <sub>36</sub> O <sub>4</sub> |
| 29                                                      | 26.1<br>0 | Deoxyhumulone/deoxyadlupulone | 345.2064 | 346.2135,<br>301.2297<br>221.0866  | -2.03 | 290,<br>335 | C <sub>21</sub> H <sub>30</sub> O <sub>4</sub> |
| 30                                                      | 26.8<br>0 | Lupulone                      | 413.2698 | 301.1446,<br>344.1991,<br>233.0808 | 2.83  | 235,<br>360 | C <sub>26</sub> H <sub>38</sub> O <sub>4</sub> |
| 31                                                      | 26.9<br>5 | Adlupulone                    | 413.2698 | 301.1446,<br>344.1991,<br>233.0808 | 2.83  | 235,<br>360 | C <sub>26</sub> H <sub>38</sub> O <sub>4</sub> |
| <i><b>Prenylflavonoids</b></i>                          |           |                               |          |                                    |       |             |                                                |
| 32                                                      | 18.2<br>5 | Oxy-Xanthohumol               | 369.1336 | 249.0772                           | -5.40 | 255,<br>307 | C <sub>21</sub> H <sub>22</sub> O <sub>6</sub> |
| 33                                                      | 18.3<br>2 | Isoxanthohumol                | 353.1405 | 233.0921,<br>189.0277<br>175.0147  | -0.85 | 370         | C <sub>21</sub> H <sub>22</sub> O <sub>5</sub> |
| 34                                                      | 20.1<br>0 | Xanthohumol*                  | 353.1405 | 233.0921,<br>189.0277<br>175.0147  | -0.85 | 370         | C <sub>21</sub> H <sub>22</sub> O <sub>5</sub> |
| 35                                                      | 25.1<br>0 | Prenyl-naringenin             | 339.1229 | 219.0672,<br>245.0805              | -1.75 | 294,<br>337 | C <sub>20</sub> H <sub>20</sub> O <sub>5</sub> |

\* Identified according to standard retention times.
