# Supplementary material for: α acid fraction from Hop extract exerts an endothelium-derived hyperpolarization vasorelaxant effect through TRPV4 employing the feedforward mechanism of PKCα
Source: Royal Society of Chemistry journal article supplement (doi:10.1039/d4fo00058g), 2024-01-01
Supplement: d4fo00058g2.pdf [file d4fo00058g2.pdf]

## Supporting Information

$\alpha$  acid fraction from Hop extract exerts an endothelium-derived hyperpolarization vasorelaxant effect through TRPV4 employing a feedforward mechanism of PKC $\alpha$

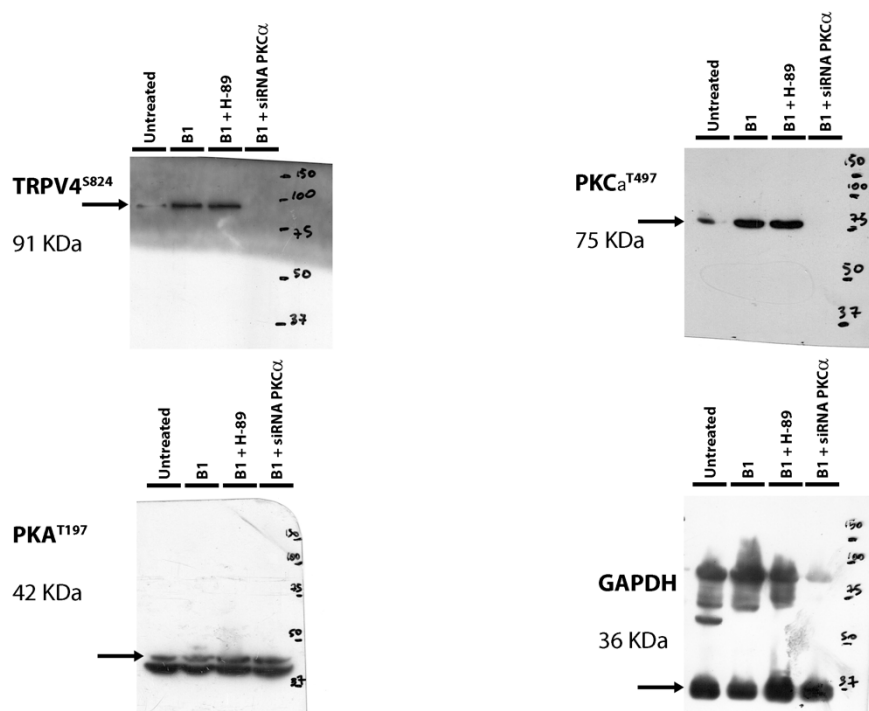

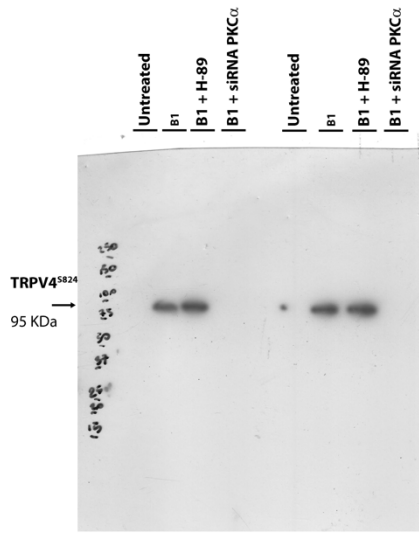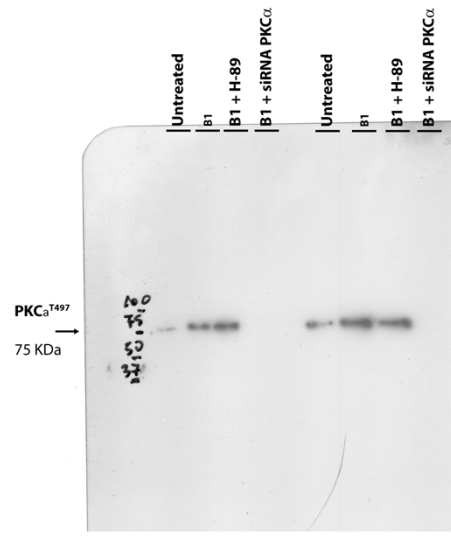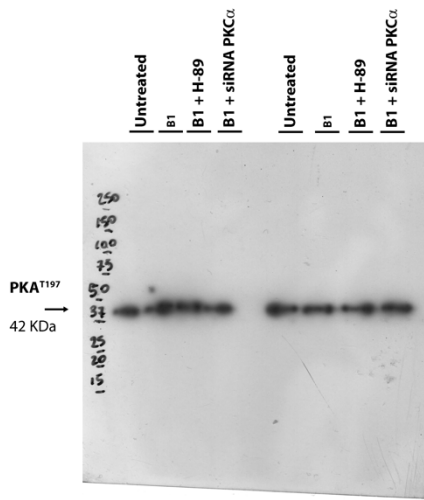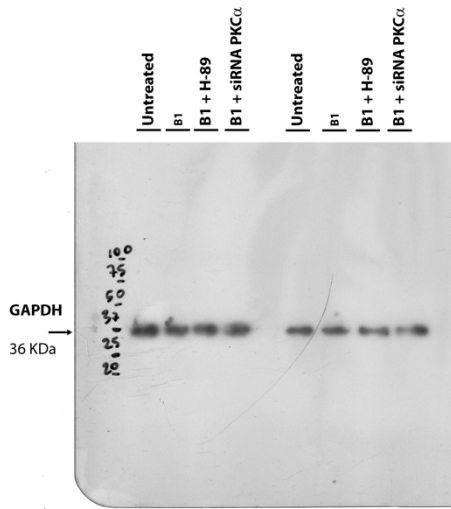

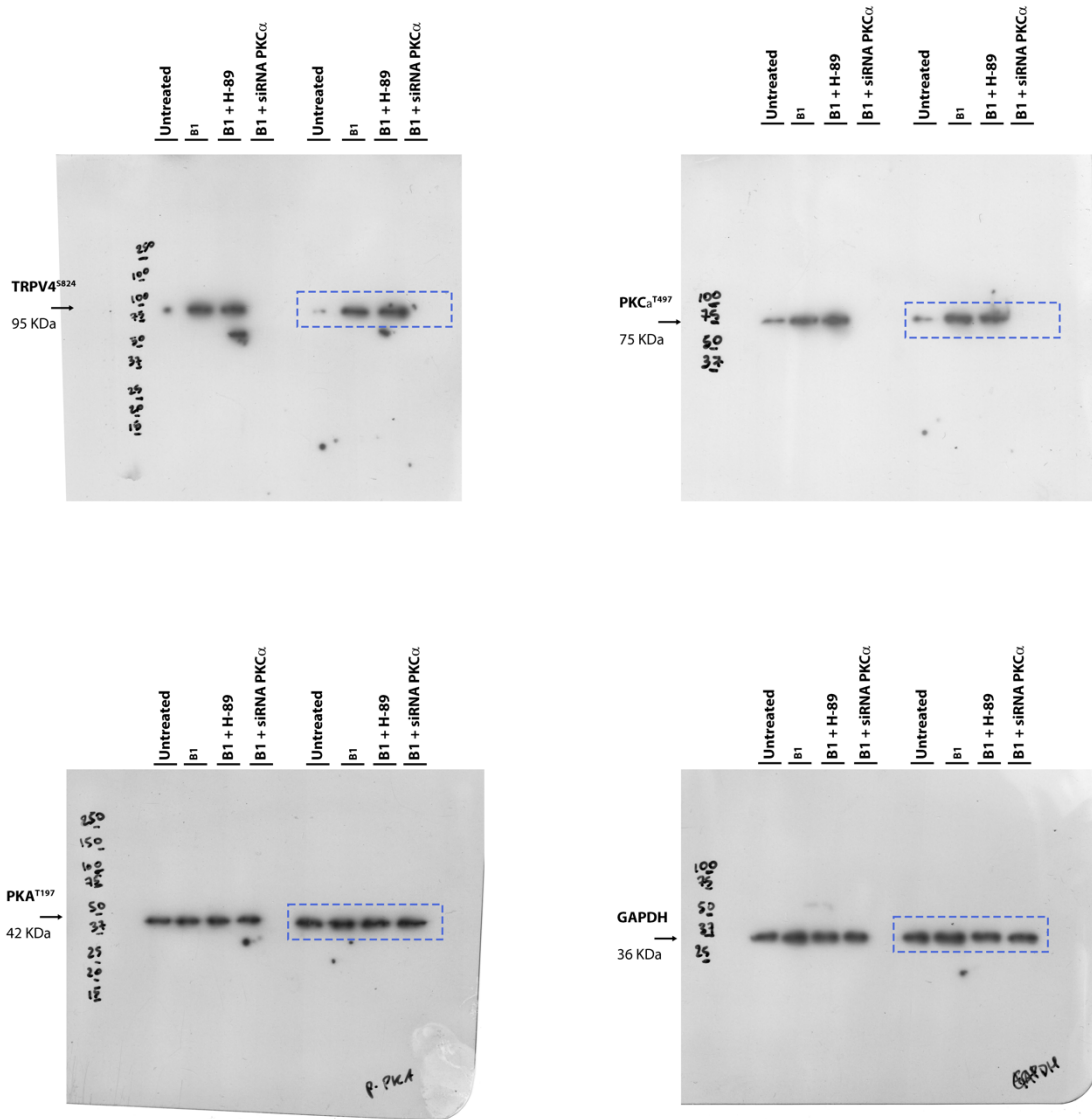

**Figure S1.** Raw images of five independent Western blotting experiments. Lanes in blue boxes has been used in the main text as representative WB in Figure 7.
